# Supplementary material
Source: Royal Society of Chemistry journal article supplement (doi:10.1039/d5ma01242b)
Supplement: d5ma01242b1.pdf [file d5ma01242b1.pdf]

## Supporting information

### High Performance Mercury Sensing Enabled by the Synergistic Effect of rGO–MnO<sub>2</sub> Nanocomposites

Md Emon Hasan Sourav<sup>1</sup>, Md Tawabur Rahman<sup>1\*</sup>, Md Nazmul Islam<sup>1</sup>, Mohammad Abu Yousuf<sup>\*2</sup>, Parbhej Ahamed<sup>2</sup>, Habiba Jahan<sup>2</sup>, and Nusrat Tazeen Tonu<sup>2</sup>

<sup>1</sup>Department of Electrical and Electronic Engineering, Khulna University of Engineering & Technology, Khulna 9203, Bangladesh

<sup>2</sup>Department of Chemistry, Khulna University of Engineering & Technology, Khulna 9203, Bangladesh

\*Corresponding authors: tawabur@eee.kuet.ac.bd, yousuf@chem.kuet.ac.bd

#### 1. Calculation of Electroactive Surface Area, A (cm<sup>2</sup>) of the GCE

Randles–Sevcik equation was used to calculate the electroactive surface area. The Randles–Sevcik equation can be expressed as,  $I_p = 2.69 \times 10^5 n^{3/2} A D^{1/2} C v^{1/2}$ . Where A is the electroactive surface area (cm<sup>2</sup>), D is the diffusion coefficient of the redox species ( $7.6 \times 10^{-6}$  cm<sup>2</sup>/s), C is the bulk concentration of the redox probe ( $5.0 \times 10^{-6}$  mol/cm<sup>3</sup>), v is the scan rate (V/s), I<sub>p</sub> is the peak current (A) and n is the number of electrons transferred, normally n = 1, for K<sub>3</sub>[Fe(CN)<sub>6</sub>].

**Table S1.** Active Surface Area Calculation of the GCE

| Measurement No. | Scan Rate, v (mV/s) | Peak Current, I <sub>p</sub> (μA) | I <sub>p</sub> , (A)   | v (V/s) | v <sup>1/2</sup> | Calculated Active Area, A (cm <sup>2</sup> ) |
|-----------------|---------------------|-----------------------------------|------------------------|---------|------------------|----------------------------------------------|
| 1               | 10                  | 83.6                              | $8.36 \times 10^{-5}$  | 0.01    | 0.100            | 0.225                                        |
| 2               | 20                  | 119.3                             | $11.93 \times 10^{-5}$ | 0.02    | 0.141            | 0.228                                        |
| 3               | 40                  | 168.4                             | $16.84 \times 10^{-5}$ | 0.04    | 0.200            | 0.227                                        |
| 4               | 60                  | 205.5                             | $20.55 \times 10^{-5}$ | 0.06    | 0.245            | 0.226                                        |

|   |     |       |                        |      |       |       |
|---|-----|-------|------------------------|------|-------|-------|
| 5 | 80  | 237.6 | $23.76 \times 10^{-5}$ | 0.08 | 0.283 | 0.229 |
| 6 | 100 | 261.3 | $26.13 \times 10^{-5}$ | 0.10 | 0.316 | 0.226 |

Calculated Average Electroactive Surface Area,  $A = 0.227 \text{ cm}^2$

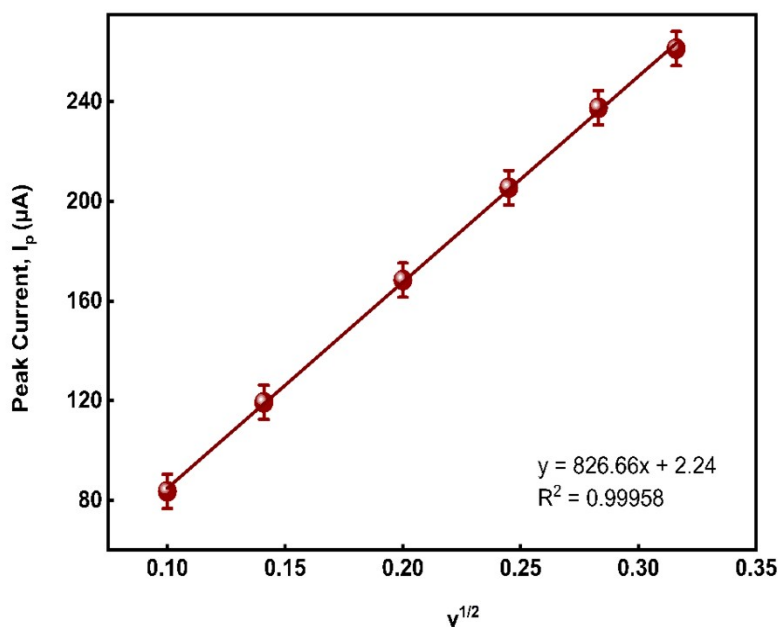

**Figure S1.** Anodic peak current ( $I_p$ ) vs the square root of the scan rate ( $v^{1/2}$ ).

## 2. Calculation of $\sigma$ , LOD, and LOQ for the rGO–MnO<sub>2</sub>/GCE Sensor

The limit of detection (LOD) and limit of quantification (LOQ) were evaluated using the standard deviation of the blank signal ( $\sigma$ ) and the slope ( $S$ ) of the calibration curve, following the well-established relations  $\text{LOD} = 3.3\sigma/S$  and  $\text{LOQ} = 10\sigma/S$ .

The value of slope,  $S$  ( $\mu\text{A}/\text{nM}$ ) = 6.81 (From the calibration curve)

**Table S2.** Calculation of  $\sigma$

| Measurement No. | Blank Current Response, $x_i$ ( $\mu\text{A}$ ) | Deviation from Mean, $(x_i - \bar{x})$ ( $\mu\text{A}$ ) | Deviations, $(x_i - \bar{x})^2$ |
|-----------------|-------------------------------------------------|----------------------------------------------------------|---------------------------------|
| 1               | 1.45                                            | -0.31                                                    | 0.0961                          |
| 2               | 2.05                                            | +0.29                                                    | 0.0841                          |
| 3               | 1.80                                            | +0.04                                                    | 0.0016                          |

|                                                                                                                       |      |       |        |
|-----------------------------------------------------------------------------------------------------------------------|------|-------|--------|
| 4                                                                                                                     | 1.60 | -0.16 | 0.0256 |
| 5                                                                                                                     | 1.90 | +0.14 | 0.0196 |
| <b>Sum, <math>\sum x_i</math> (<math>\mu\text{A}</math>)</b>                                                          | 8.80 | —     | —      |
| <b>Mean, <math>\bar{x}</math> (<math>\mu\text{A}</math>)</b>                                                          | 1.76 | —     | —      |
| <b><math>\sigma</math> (<math>\mu\text{A}</math>),<br/><math>\sigma = \frac{\sum (x_i - \bar{x})^2}{n - 1}</math></b> | 0.20 | —     | —      |

From the table, the standard deviation of the blank signal,  $\sigma = 0.20$

$$\text{Hence, LOD} = 3.3\sigma/S = 0.097 \text{ nM}$$

$$\text{LOQ} = 10\sigma/S = 0.294 \text{ nM}$$

### 3. RSD & Stability Calculations

#### 3.1. Repeatability Test – RSD Calculation

The repeatability of the sensor was evaluated by performing five consecutive measurements of rGO–MnO<sub>2</sub> modified GCE in presence of 10  $\mu\text{M}$  Hg<sup>2+</sup> under same condition. The stripping peak currents obtained from these trials exhibited minimal variation, with a relative standard deviation (RSD) of just 1.03%.

**Table S3.** Calculation of RSD (Repeatability Test)

| Measurement No.                    | Response, $x_i$ ( $\mu\text{A}$ ) | Deviation from Mean, $(x_i - \bar{x})$ ( $\mu\text{A}$ ) | (Deviation) <sup>2</sup> ( $\mu\text{A}^2$ ) |
|------------------------------------|-----------------------------------|----------------------------------------------------------|----------------------------------------------|
| 1                                  | 151                               | -2                                                       | 4                                            |
| 2                                  | 153                               | 0                                                        | 0                                            |
| 3                                  | 154                               | +1                                                       | 1                                            |
| 4                                  | 152                               | -1                                                       | 1                                            |
| 5                                  | 155                               | +2                                                       | 4                                            |
| <b>Sum</b>                         | <b>765</b>                        | —                                                        | <b>10</b>                                    |
| <b>Mean (<math>\bar{x}</math>)</b> | <b>153</b>                        | —                                                        | —                                            |

$$\text{Variance, } s^2 = \frac{\sum (x_i - \bar{x})^2}{n - 1} = 2.5$$

$$\text{Standard Deviation (SD), } s = \sqrt{2.5} = 1.58$$

$$\text{Relative Standard Deviation, RSD(\%)} = \frac{s}{\bar{x}} \times 100 = 1.03 \%$$

### 3.2. Reproducibility Test – RSD Calculation

To examine the reproducibility of the fabrication process, three independently prepared rGO–MnO<sub>2</sub> modified GCEs were employed to detect 10 μM Hg<sup>2+</sup> under identical conditions. Both electrodes yielded highly comparable stripping responses, with an RSD of 1.02%. These results affirm the reliability and uniformity of the electrode modification protocol, indicating that the method can consistently produce functionally equivalent sensors.

**Table S4.** Calculation of RSD (Reproducibility Test)

| Measurement No.  | Response, xi (μA) | Deviation from Mean, (xi-x̄) (μA) | (Deviation) <sup>2</sup> , ∑(xi-x̄) <sup>2</sup> , (μA <sup>2</sup> ) |
|------------------|-------------------|-----------------------------------|-----------------------------------------------------------------------|
| 1                | 233.4             | +2.27                             | 5.15                                                                  |
| 2                | 231.3             | +0.17                             | 0.03                                                                  |
| 3                | 228.7             | -2.43                             | 5.90                                                                  |
| <b>Sum</b>       | <b>693.4</b>      | —                                 | <b>11.08</b>                                                          |
| <b>Mean (x̄)</b> | <b>231.13</b>     | —                                 | —                                                                     |

$$\text{Variance, } s^2 = \frac{\sum(xi - \bar{x})^2}{n - 1} = 5.54$$

$$\text{Standard Deviation (SD), } s = \sqrt{5.54} = 2.35$$

$$\text{Relative Standard Deviation, RSD(\%)} = \frac{s}{\bar{x}} \times 100 = 1.02 \%$$

### 3.3. Calculation of % stability

The long-term operational stability of the modified electrode was assessed over a 30-day period. Stripping voltammetry measurements were taken at three-day intervals while the electrodes were stored under ambient laboratory conditions. The sensor retained 96.23% of its initial response after 12 days and 92.34% even after 30 days, confirming outstanding long-term stability.

$$\text{Stability at day } t, S(\%) = \frac{\text{Current Response, } I}{\text{Peak Current}} \times 100 \%$$

**Table S5.** Calculation of % stability at different days

| <b>Day</b> | <b>Current Response, I (μA)</b> | <b>Stability (%)</b> |
|------------|---------------------------------|----------------------|
| 1          | 233.27                          | 100.00               |
| 3          | 231.12                          | 99.08                |
| 6          | 229.46                          | 98.37                |
| 9          | 227.14                          | 97.37                |
| 12         | 224.48                          | 96.23                |
| 15         | 222.15                          | 95.23                |
| 18         | 220.65                          | 94.58                |
| 21         | 218.82                          | 93.80                |
| 24         | 217.06                          | 93.06                |
| 27         | 216.67                          | 92.88                |
| 30         | 215.4                           | 92.34                |
